# Supplementary material for: Self-healing ferroelastic metal–organic framework sensing guests, pressure and chemical environment
Source: Royal Society of Chemistry journal article supplement (doi:10.1039/d1ma00111f), 2021-01-01
Supplement: d1ma00111f2.pdf [file d1ma00111f2.pdf]

## Supporting Information

# Self-healing ferroelastic metal-organic framework sensing guests, pressure and chemical environment

*Aleksandra Pótrolniczak and Andrzej Katrusiak\**

\*Department of Materials Chemistry, Faculty of Chemistry, Adam Mickiewicz University, Uniwersytetu  
Poznańskiego 8, 61-614 Poznan, Poland, katran@amu.edu.pl.

### Synthesis of AMU3

Single crystals of  $\text{Cd}(\text{BDC})_2(\text{AZPY})$  (BDC=terephthalic acid; AZPY=4,4'-azobispyridine), abbreviated as AMU3, were obtained using a diffusion method, similar to those described previously.<sup>1-4</sup> In our present study, the two layers containing the substrates, 0.092 g (0.3 mmol) of cadmium nitrate (Sigma-Aldrich) and 0.049 g (0.3 mmol) of terephthalic acid (Sigma-Aldrich) dissolved in 5 mL of DMF and 0.056 g (0.3 mmol) of 4,4'-azobispyridine (Sigma-Aldrich) dissolved in 5 mL of MeOH, were separated by the mixture of 1 mL of DMF with 1 mL of MeOH providing the diffusion environment. After 1 week, orange block crystals appeared.

### Raman spectra collection

Raman scattering from AMU3 were collected. High-pressure measurements were performed for polycrystalline sample in DAC (diamond anvil cell) with methanol:ethanol:water mixture (16:3:1 volume ratio) as hydrostatic liquid. High-pressure Raman measurements were performed with customized in-house Raman spectrometer, equipped in M266 laser from Solar Laser Systems, and multichannel detector from Hamamatsu Photonics. For data collection and processing program SpectroLab were used.

The main Raman lines for AMU3 are observed at about 1600, 1550, 1500, 1465, 1412, 1250, 1170, 1115, 1020 and 660  $\text{cm}^{-1}$ . Data were collected to 5 GPa and the changes in the position and shape of the peaks are shown in Figure S1. The Raman spectra of AMU3 display the expected increase in the frequency of vibrations with pressure, with the exception of small drops in the Raman shifts at the phase-transition point at 0.4 GPa.

## Supporting Information

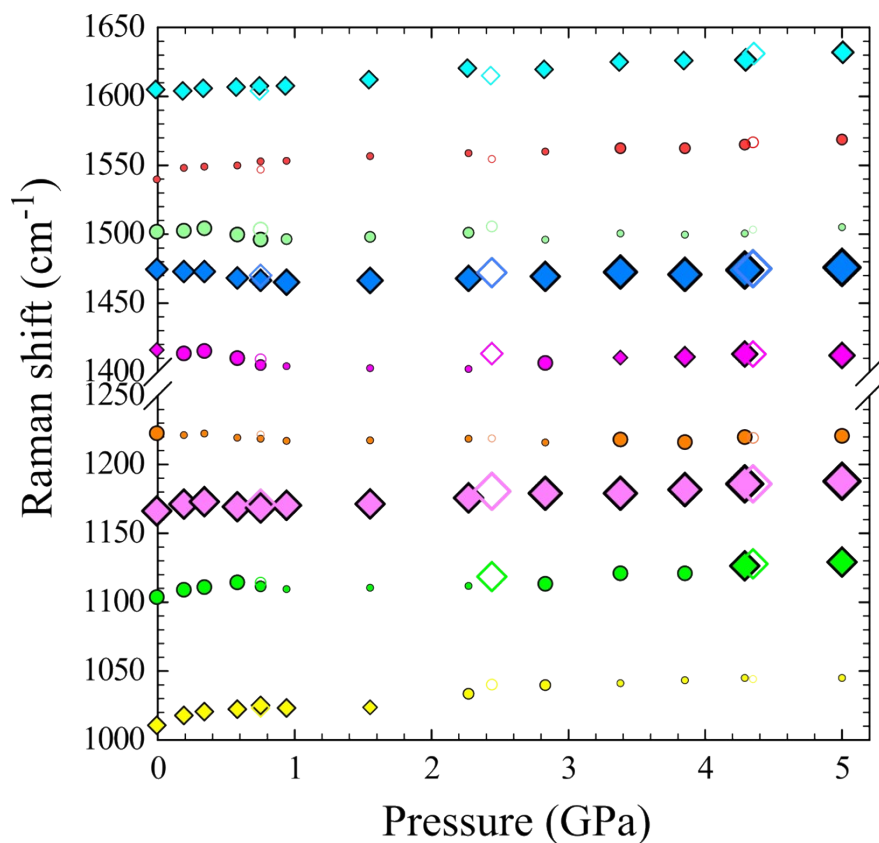

**Figure S1.** Pressure evolution of the Raman spectra of AMU3. Diamonds indicate sharp peaks and circles indicate broad peaks. Open symbols define the decompression measurements. The size of plotted symbols represents the bond intensities.

## Theoretical studies

Lowest energy molecular geometries and harmonic vibrational energies were calculated using the Gaussian16 software package.<sup>5</sup> The electron density was modeled by Gaussian-type orbitals. The B3LYP functional and the STO-3G basis set were used along with default settings in Gaussian16. The computational work consisted of two steps: (1) structure optimization based on input coordinates generated from a crystallographic information file (CIF) and (2) calculation of vibrational frequencies.

## Supporting Information

a)

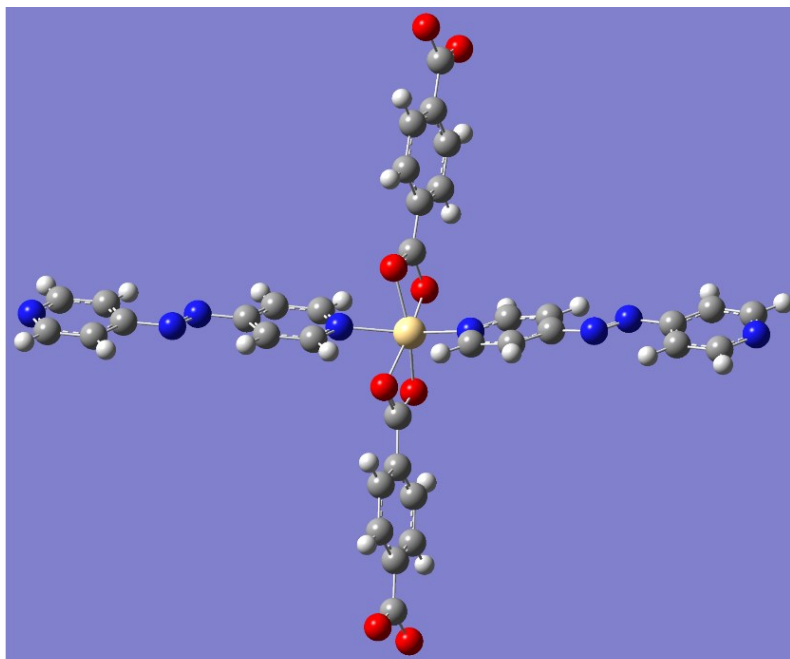

b)

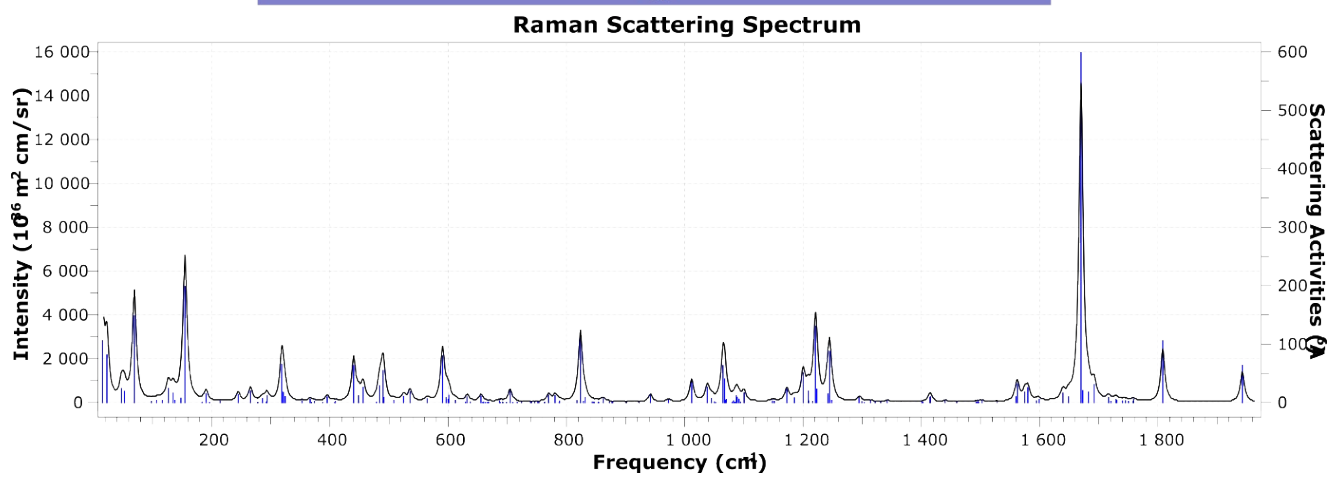

**Figure S2.** a) Part of polymer used for calculations and b) calculated Raman spectra.

## Supporting Information

### Crystal structure

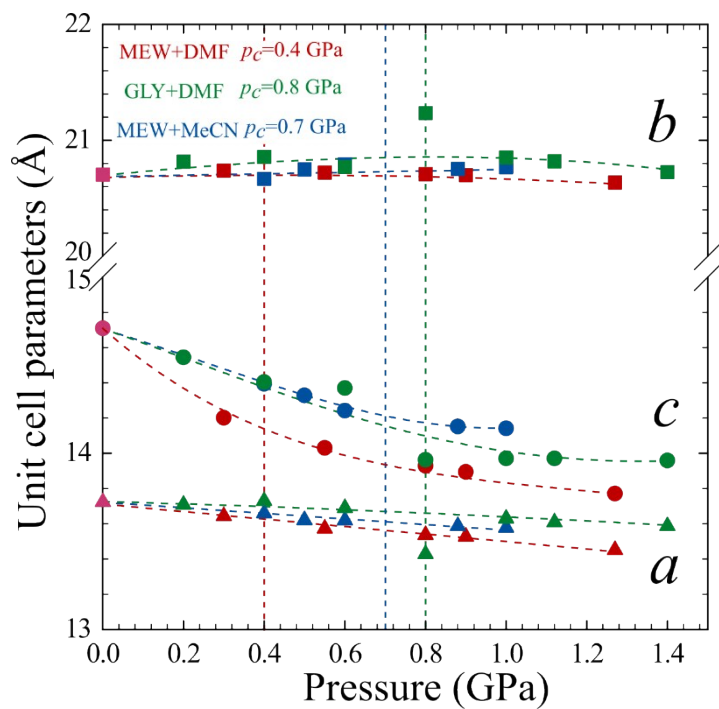

**Figure S3.** Unit cell parameters of three series of AMU3 in the function of pressure. Red color indicate AMU3-DMF with methanol:ethanol:water mixture (MEW,16:3:1 vol. ratio) used as pressure transmitting medium (PTM); green mark AMU3-DMF with glycerine (GLY) used as PTM, and blue for AMU3-MeCN with MEW as a PTM. The monoclinic phase  $\beta$  were calculated to corresponding phase  $\alpha$ . The ESD's are smaller than plotted symbols.

## Supporting Information

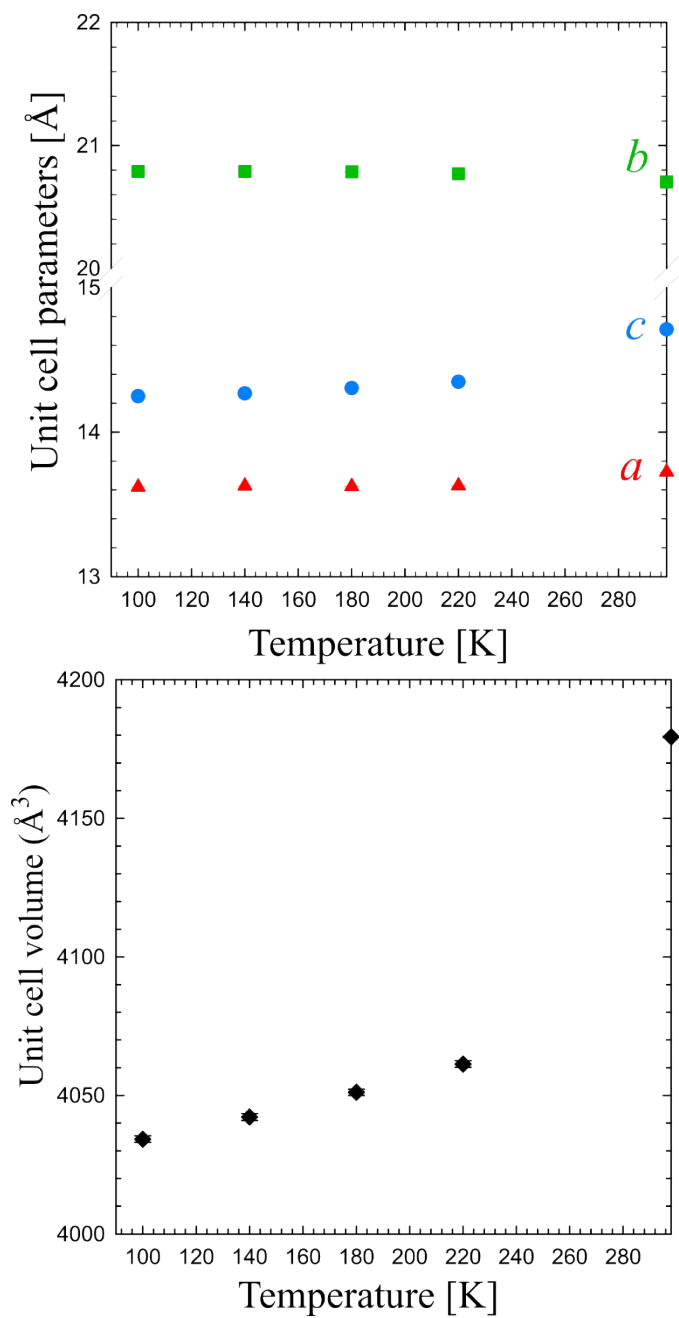

**Figure S4.** Unit cell parameters of AMU3-DMF in the function of temperature. The ESD's are smaller than plotted symbols.

## Supporting Information

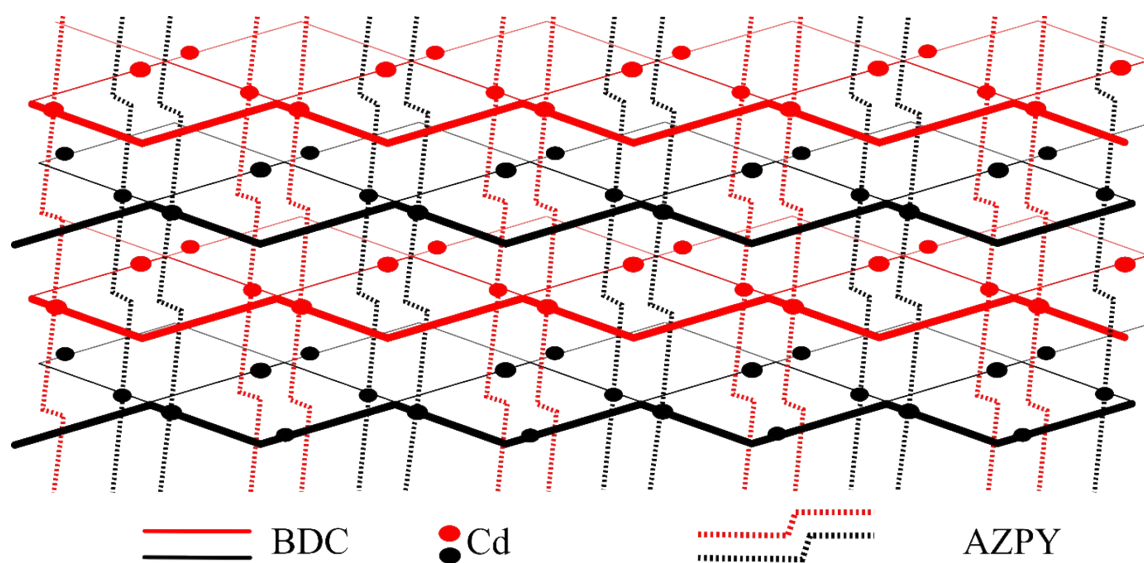

**Figure S5.** Coordination scheme of AMU3. Red and black colour indicate interwoven frameworks.

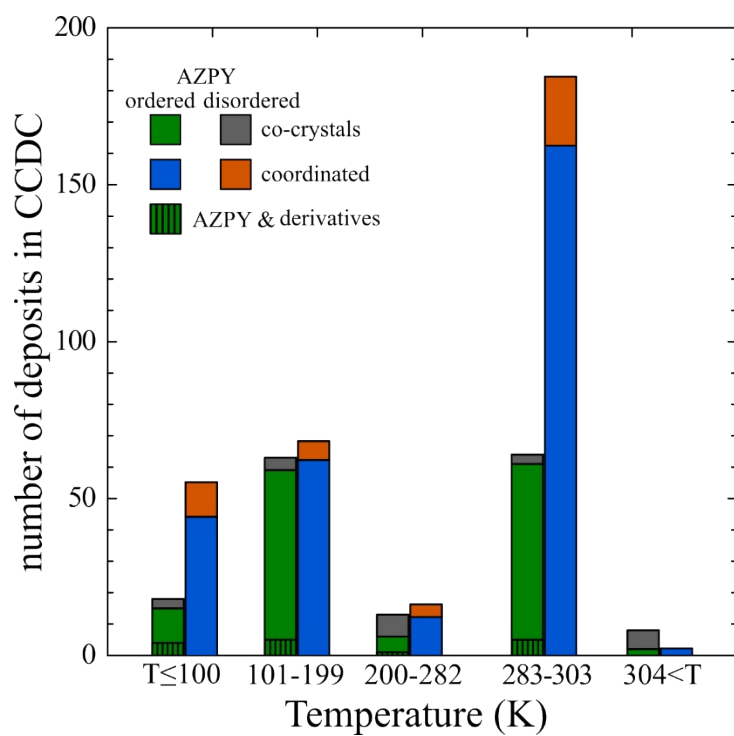

**Figure S6.** Number of crystal structures with ordered and disordered AZPY molecules, found in the CCDC.

## Supporting Information

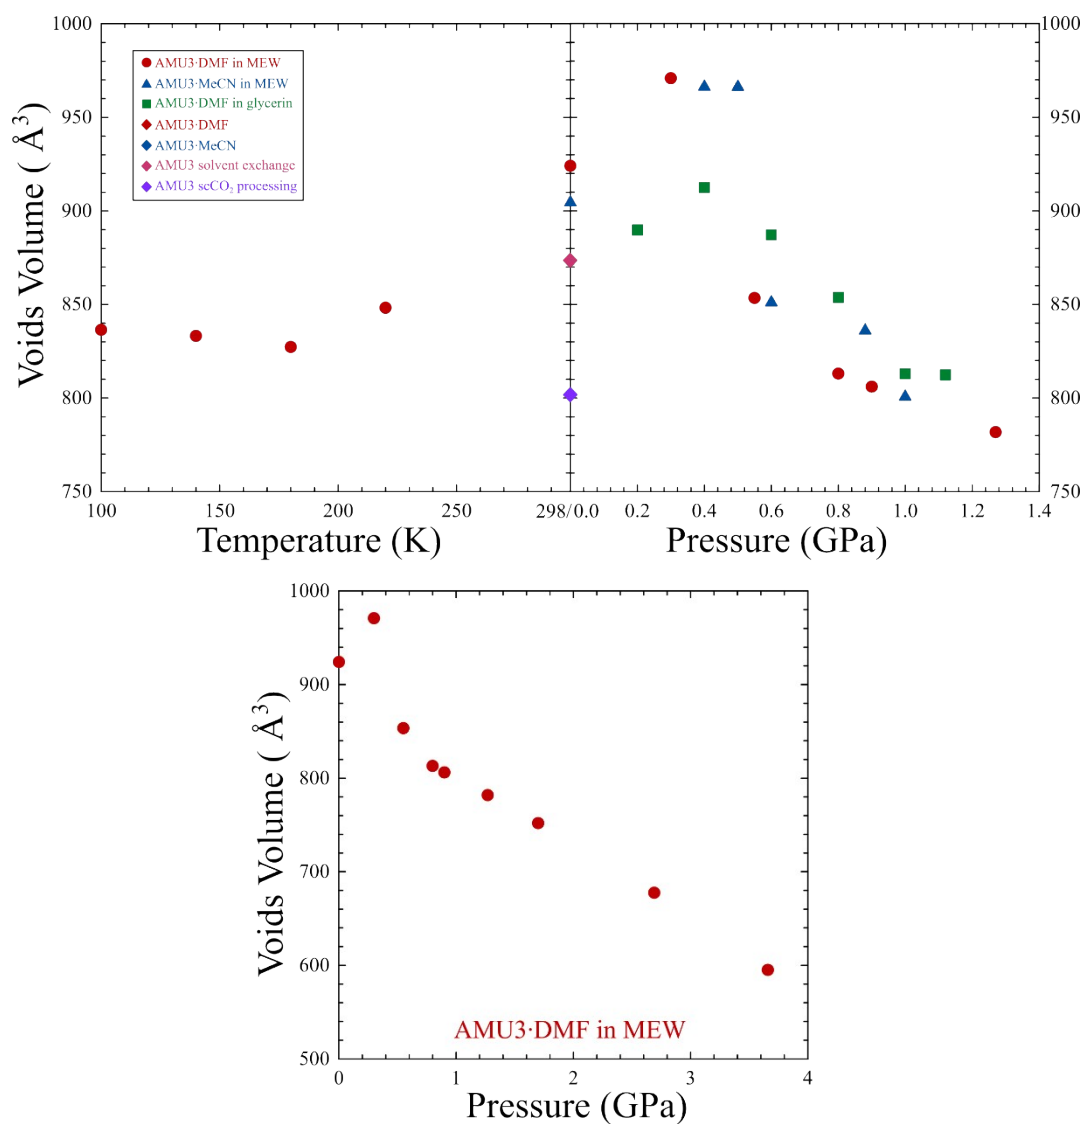

**Figure S7.** (Top) Voids volume as a function of temperature (left) and pressure range to 1.4 GPa (right) and to 4 GPa for AMU3-DMF compressed in MEW (down). The voids volume was calculated by Mercury based on Contact Surface (probe radius 1.4 Å, grid 0.2 Å), after removing the guest molecules by solvent mask tool in OLEX2 (Solvent r = 1.2 Å). Maximum probe radius for crystal at 3.66 GPa is 1.6 Å, for lower pressures is 1.7 Å.

## Supporting Information

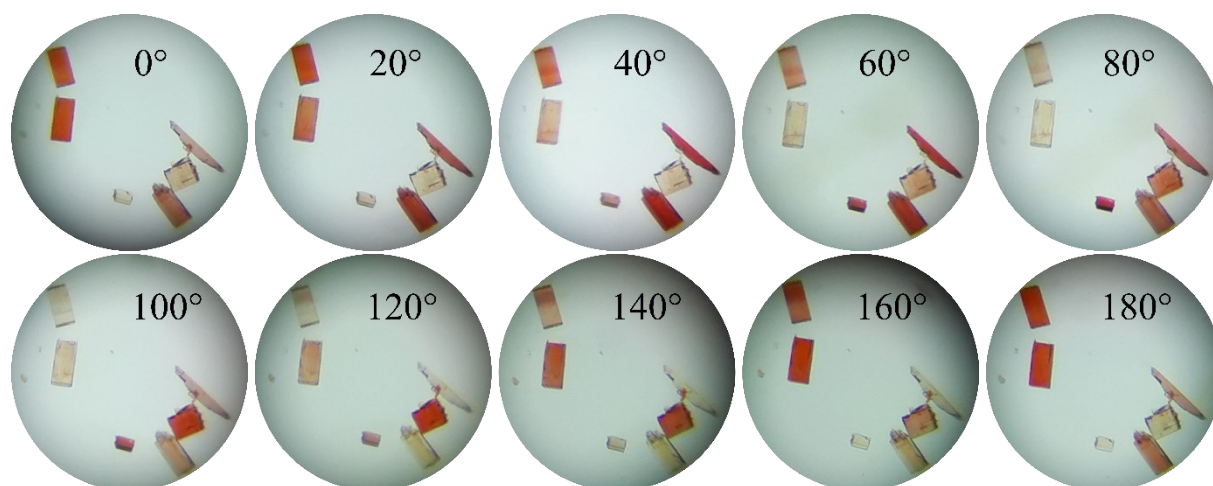

**Figure S8.** Pleochroic effect of  $\alpha$ -AMU3-DMF illustrated for several crystals viewed in the polarized transmitting light with its polarization vector rotated in 20° steps.

**Table S1.** Compressibility related to crystallographic axes calculated for the  $\alpha$ -AMU3-DMF compressed in MEW with Birch-Murnaghan coefficients, calculated in the range between 0.1 MPa and 0.3 GPa, by using program PASCAL.<sup>6</sup>

| Axes           | K(TPa <sup>-1</sup> ) | $\sigma$ K(TPa <sup>-1</sup> ) | Direction |          |          | Empirical parameters |            |        |        |
|----------------|-----------------------|--------------------------------|-----------|----------|----------|----------------------|------------|--------|--------|
|                |                       |                                | <i>a</i>  | <i>b</i> | <i>c</i> | $\epsilon_0$         | $\lambda$  | $P_c$  | $\nu$  |
| X <sub>1</sub> | 117.4039              | 0.0000                         | -0.0000   | -0.0000  | 1.0000   | 0.0000e+00           | 0.0000e+00 | 0.0000 | 0.0000 |
| X <sub>2</sub> | 19.6896               | 0.0000                         | -1.0000   | -0.0000  | 0.0000   | 0.0000e+00           | 0.0000e+00 | 0.0000 | 0.0000 |
| X <sub>3</sub> | -5.6482               | 0.0000                         | -0.0000   | 1.0000   | -0.0000  | 0.0000e+00           | 0.0000e+00 | 0.0000 | 0.0000 |
| V              | 128.9364              | 0.0000                         |           |          |          |                      |            |        |        |

Birch-Murnaghan Coefficients

|                 | $B_0$ (GPa) | $\sigma B_0$ (GPa) | $V_0$ (Å <sup>3</sup> ) | $\sigma V_0$ (Å <sup>3</sup> ) | $B'$ | $\sigma B'$ | $P_c$ (GPa) |
|-----------------|-------------|--------------------|-------------------------|--------------------------------|------|-------------|-------------|
| 2 <sup>nd</sup> | 7.0275      | -                  | 4179.4470               | -                              | 4    | n/a         | 0           |

**Table S2.** Compressibility related to crystallographic axes calculated for the  $\beta$ -AMU3-DMF compressed in MEW with Birch-Murnaghan coefficients, calculated in the range between 0.55 GPa and 3.66 GPa, by using program PASCAL.<sup>6</sup>

| Axes           | K(TPa <sup>-1</sup> ) | $\sigma$ K(TPa <sup>-1</sup> ) | Direction |          |          | Empirical parameters |             |         |        |
|----------------|-----------------------|--------------------------------|-----------|----------|----------|----------------------|-------------|---------|--------|
|                |                       |                                | <i>a</i>  | <i>b</i> | <i>c</i> | $\epsilon_0$         | $\lambda$   | $P_c$   | $\nu$  |
| X <sub>1</sub> | 29.1191               | 0.8824                         | -0.9618   | 0.0000   | -0.2737  | 7.1074e-01           | -4.3570e-01 | -5.3478 | 0.2752 |
| X <sub>2</sub> | 16.7470               | 0.6913                         | 0.0000    | 1.0000   | 0.0000   | 1.6169e-02           | -3.4807e-02 | 0.3112  | 0.5566 |
| X <sub>3</sub> | -20.2868              | 2.0559                         | -0.1243   | 0.0000   | -0.9922  | -1.8152e-03          | 1.8071e-02  | 0.5500  | 1.1061 |
| V              | 24.7714               | 1.6435                         |           |          |          |                      |             |         |        |

Birch-Murnaghan Coefficients



## Supporting Information

|                 | $B_0$ (GPa) | $\sigma B_0$ (GPa) | $V_0$ (Å <sup>3</sup> ) | $\sigma V_0$ (Å <sup>3</sup> ) | $B'$    | $\sigma B'$ | $P_c$ (GPa) |
|-----------------|-------------|--------------------|-------------------------|--------------------------------|---------|-------------|-------------|
| 2 <sup>nd</sup> | 31.8236     | 2.6027             | 1995.1809               | 8.2906                         | 4       | n/a         | 0           |
| 3 <sup>rd</sup> | 8.8670      | 24.3892            | 2043.9090               | 94.3160                        | 34.0779 | 93.9301     | 0           |

**Table S3.** Compressibility related to crystallographic axes calculated for the  $\alpha$ -AMU3-MeCN compressed in MEW with Birch-Murnaghan coefficients, calculated in the range between 0.1 MPa and 0.6 GPa, by using program PASCAL.<sup>6</sup>

| Axes     | K(TPa <sup>-1</sup> ) | $\sigma K$ (TPa <sup>-1</sup> ) | Direction |         |         | Empirical parameters |             |         |        |
|----------|-----------------------|---------------------------------|-----------|---------|---------|----------------------|-------------|---------|--------|
|          |                       |                                 | $a$       | $b$     | $c$     | $\epsilon_0$         | $\lambda$   | $P_c$   | $\nu$  |
| $X_1$    | 55.5424               | 0.0000                          | -0.0000   | -0.0000 | 1.0000  | 3.4881e-02           | -1.4554e-03 | -2.8429 | 3.0451 |
| $X_2$    | 15.3337               | 0.0000                          | -1.0000   | 0.0000  | 0.0000  | 9.4307e-05           | -1.3341e-02 | 0.0001  | 1.4366 |
| $X_3$    | -61.8400              | 0.0000                          | -0.0000   | 1.0000  | -0.0000 | -1.3866e-03          | 2.0257e-01  | -0.0009 | 7.2082 |
| <b>V</b> | 51.8958               | 1.5945                          |           |         |         |                      |             |         |        |

Birch-Murnaghan Coefficients

|                 | $B_0$ (GPa) | $\sigma B_0$ (GPa) | $V_0$ (Å <sup>3</sup> ) | $\sigma V_0$ (Å <sup>3</sup> ) | $B'$    | $\sigma B'$ | $P_c$ (GPa) |
|-----------------|-------------|--------------------|-------------------------|--------------------------------|---------|-------------|-------------|
| 2 <sup>nd</sup> | 17.9943     | 1.2091             | 4157.0463               | 6.2797                         | 4       | n/a         | 0           |
| 3 <sup>rd</sup> | 11.0043     | 3.7452             | 4158.6782               | 6.4407                         | 47.8662 | 35.0213     | 0           |

**Table S4.** Compressibility related to crystallographic axes calculated for the  $\beta$ -AMU3-MeCN compressed in MEW with Birch-Murnaghan coefficients, calculated in the range between 0.88 GPa and 1.0 GPa, by using program PASCAL.<sup>6</sup>

| Axes     | K(TPa <sup>-1</sup> ) | $\sigma K$ (TPa <sup>-1</sup> ) | Direction |         |        | Empirical parameters |            |        |        |
|----------|-----------------------|---------------------------------|-----------|---------|--------|----------------------|------------|--------|--------|
|          |                       |                                 | $a$       | $b$     | $c$    | $\epsilon_0$         | $\lambda$  | $P_c$  | $\nu$  |
| $X_1$    | 7.6993                | 0.0000                          | 0.8676    | 0.0000  | 0.4973 | 0.0000e+00           | 0.0000e+00 | 0.0000 | 0.0000 |
| $X_2$    | 5.8914                | 0.0000                          | 0.0000    | -1.0000 | 0.0000 | 0.0000e+00           | 0.0000e+00 | 0.0000 | 0.0000 |
| $X_3$    | -7.9250               | 0.0000                          | -0.2239   | 0.0000  | 0.9746 | 0.0000e+00           | 0.0000e+00 | 0.0000 | 0.0000 |
| <b>V</b> | 5.6657                | 0.0000                          |           |         |        |                      |            |        |        |

Birch-Murnaghan Coefficients

|                 | $B_0$ (GPa) | $\sigma B_0$ (GPa) | $V_0$ (Å <sup>3</sup> ) | $\sigma V_0$ (Å <sup>3</sup> ) | $B'$ | $\sigma B'$ | $P_c$ (GPa) |
|-----------------|-------------|--------------------|-------------------------|--------------------------------|------|-------------|-------------|
| 2 <sup>nd</sup> | 172.6900    | -                  | 2004.9188               | -                              | 4    | n/a         | 0           |

**Table S5.** Compressibility related to crystallographic axes calculated for the  $\alpha$ -AMU3-DMF compressed in glycerin with Birch-Murnaghan coefficients, calculated in the range between 0.1 MPa and 0.6 GPa, by using program PASCAL.<sup>6</sup>

## Supporting Information

| Axes           | K(TPa <sup>-1</sup> ) | $\sigma$ K(TPa <sup>-1</sup> ) | Direction |          |          | Empirical parameters |             |         |          |
|----------------|-----------------------|--------------------------------|-----------|----------|----------|----------------------|-------------|---------|----------|
|                |                       |                                | <i>a</i>  | <i>b</i> | <i>c</i> | $\epsilon_0$         | $\lambda$   | $P_c$   | $\nu$    |
| X <sub>1</sub> | 21.2944               | 0.0000                         | 0.0000    | 0.0000   | 1.0000   | 1.1515e+01           | -1.1544e+01 | -0.1613 | 0.0014   |
| X <sub>2</sub> | 134.8696              | 0.0000                         | -1.0000   | 0.0000   | 0.0000   | -4.0568e-04          | -5.8865e-03 | -0.3838 | 60.1440  |
| X <sub>3</sub> | -0.0000               | 0.0000                         | 0.0000    | -1.0000  | 0.0000   | 5.2535e-03           | -3.5312e-03 | -0.9942 | -69.6077 |
| V              | 37.2038               | 1.3219                         |           |          |          |                      |             |         |          |

Birch-Murnaghan Coefficients

|                 | $B_0$ (GPa) | $\sigma B_0$ (GPa) | $V_0$ (Å <sup>3</sup> ) | $\sigma V_0$ (Å <sup>3</sup> ) | $B'$     | $\sigma B'$ | $P_c$ (GPa) |
|-----------------|-------------|--------------------|-------------------------|--------------------------------|----------|-------------|-------------|
| 2 <sup>nd</sup> | 25.2643     | 1.9169             | 4182.0983               | 4.4772                         | 4        | n/a         | 0           |
| 3 <sup>rd</sup> | 32.8453     | 4.0463             | 4178.7449               | 2.6344                         | -15.7684 | 8.4553      | 0           |

**Table S6.** Compressibility related to crystallographic axes calculated for the  $\beta$ -AMU3-DMF compressed in glycerin with Birch-Murnaghan coefficients, calculated in the range between 0.8 MPa and 1.4 GPa, by using program PASCAL.<sup>6</sup>

| Axes           | K(TPa <sup>-1</sup> ) | $\sigma$ K(TPa <sup>-1</sup> ) | Direction |          |          | Empirical parameters |             |         |          |
|----------------|-----------------------|--------------------------------|-----------|----------|----------|----------------------|-------------|---------|----------|
|                |                       |                                | <i>a</i>  | <i>b</i> | <i>c</i> | $\epsilon_0$         | $\lambda$   | $P_c$   | $\nu$    |
| X <sub>1</sub> | 13.6329               | 0.0000                         | 0.9845    | -0.0000  | -0.1753  | 2.5300e-04           | -3.6075e-02 | 0.8000  | 0.2588   |
| X <sub>2</sub> | 39.3449               | 0.0000                         | -0.0000   | 1.0000   | -0.0000  | 3.0240e-04           | -1.4978e-03 | 0.4138  | 58.7250  |
| X <sub>3</sub> | -0.0000               | 0.0000                         | 0.4900    | -0.0000  | 0.8717   | 1.4766e-02           | -6.1514e-07 | -0.0161 | -49.6266 |
| V              | 31.1247               | 2.2667                         |           |          |          |                      |             |         |          |

Birch-Murnaghan Coefficients

|                 | $B_0$ (GPa) | $\sigma B_0$ (GPa) | $V_0$ (Å <sup>3</sup> ) | $\sigma V_0$ (Å <sup>3</sup> ) | $B'$     | $\sigma B'$  | $P_c$ (GPa) |
|-----------------|-------------|--------------------|-------------------------|--------------------------------|----------|--------------|-------------|
| 2 <sup>nd</sup> | 100.0000    | 51.6822            | 2000.9179               | 12.1531                        | 4        | n/a          | 0           |
| 3 <sup>rd</sup> | 0.4406      | 1587.4222          | 2125.7005               | 9160.1240                      | 809.6616 | 2894074.1633 | 0           |

## References:

- (1) Andrzejewski, M.; Katrusiak, A. Piezochromic Topology Switch in a Coordination Polymer. *J. Phys. Chem. Lett.* **2017**, *8* (5), 929–935. <https://doi.org/10.1021/acs.jpcllett.7b00019>.
- (2) Sobczak, S.; Katrusiak, A. Zone-Collapse Amorphization Mimicking the Negative Compressibility of a Porous Compound. *Cryst. Growth Des.* **2018**, *18* (2), 1082–1089. <https://doi.org/10.1021/acs.cgd.7b01535>.
- (3) Andrzejewski, M.; Katrusiak, A. Piezochromic Porous Metal-Organic Framework. *J. Phys. Chem. Lett.* **2017**, *8* (1), 279–284. <https://doi.org/10.1021/acs.jpcllett.6b02458>.
- (4) Cai, W.; Katrusiak, A. Giant Negative Linear Compression Positively Coupled to Massive Thermal Expansion in a Metal-Organic Framework. *Nat. Commun.* **2014**, *5*, 1–8. <https://doi.org/10.1038/ncomms5337>.
- (5) Frisch, M. J.; Trucks, G. W.; Schlegel, H. B.; Scuseria, G. E.; Robb, M. A.; Cheeseman, J. R.; Scalmani, G.; Barone, V.; Petersson, G. A.; Nakatsuji, H.; et al. Gaussian 16, Rev. C.01. *Gaussian, Inc.: Wallingford CT*. 2016.

## Supporting Information

- (6) Cliffe, M. J.; Goodwin, A. L. PASCAL: A Principal Axis Strain Calculator for Thermal Expansion and Compressibility Determination. *J. Appl. Crystallogr.* **2012**, *45* (6), 1321–1329. <https://doi.org/10.1107/S0021889812043026>.

**Table S7.** Crystallographic data of Cd(BDC)(AZPY) (abbreviated as AMU3) activated and in low temperature measurements.

| Compound                                           | scCO <sub>2</sub> processed                        | in acetonitrile      | in chloroform          | as- synthesized        | AMU3·DMF              | AMU3·DMF              | AMU3·DMF              | AMU3·DMF              |           |
|----------------------------------------------------|----------------------------------------------------|----------------------|------------------------|------------------------|-----------------------|-----------------------|-----------------------|-----------------------|-----------|
| CCDC number                                        | 2046185                                            | 2046186              | 2046187                | 2046188                | 2046189               | 2046192               | 2046190               | 2046191               |           |
| Temperature (K)                                    | 298                                                | 298                  | 298                    | 298                    | 220                   | 180                   | 140                   | 100                   |           |
| Formula weight                                     | 460.72                                             | 501.77               | 460.72                 | 533.81                 | 532.80                | 532.80                | 532.80                | 532.80                |           |
| Wavelength (Å)                                     | 1.54184                                            | 1.54184              | 1.54184                | 1.54184                | 0.71073               | 0.71073               | 0.71073               | 0.71073               |           |
| Crystal system                                     | orthorhombic                                       | Orthorhombic         | orthorhombic           | orthorhombic           | orthorhombic          | orthorhombic          | orthorhombic          | orthorhombic          |           |
| Space group                                        | <i>Cmce</i>                                        | <i>Cmce</i>          | <i>Cmce</i>            | <i>Cmce</i>            | <i>Cmce</i>           | <i>Cmce</i>           | <i>Cmce</i>           | <i>Cmce</i>           |           |
| Unit cell                                          | <i>a</i> (Å)                                       | 13.6516(14)          | 13.6976(4)             | 13.6548(10)            | 13.7238(4)            | 13.649(2)             | 13.625(3)             | 13.627(2)             | 13.620(2) |
|                                                    | <i>b</i> (Å)                                       | 20.855(2)            | 20.7250(7)             | 20.8439(15)            | 20.7039(6)            | 20.820(3)             | 20.771(4)             | 20.790(3)             | 20.790(3) |
|                                                    | <i>c</i> (Å)                                       | 14.2061(15)          | 14.6495(5)             | 14.1944(12)            | 14.7091(4)            | 14.371(3)             | 14.303(4)             | 14.267(3)             | 14.247(3) |
| Volume (Å <sup>3</sup> )                           | 4044.5(7)                                          | 4158.7(2)            | 4040.0(5)              | 4179.4(2)              | 4084.0(12)            | 4047.8(15)            | 4042.2(13)            | 4034.2(12)            |           |
| Z/Z'                                               | 8/0.5                                              | 8/0.5                | 8/0.5                  | 8/0.5                  | 8/0.5                 | 8/0.5                 | 8/0.5                 | 8/0.5                 |           |
| Molecular volume (V/Z)                             | 505.56                                             | 519.84               | 505.00                 | 522.42                 | 510.50                | 505.97                | 505.27                | 504,27                |           |
| Calculated density (g/cm <sup>3</sup> )            | 1.513                                              | 1.603                | 1.475                  | 1.697                  | 1.733                 | 1.739                 | 1.751                 | 1.758                 |           |
| Absorption (mm <sup>-1</sup> )                     | 8.908                                              | 8.731                | 8.916                  | 8.764                  | 1.115                 | 1.125                 | 1.127                 | 1.129                 |           |
| <i>F</i> (000)                                     | 1824.0                                             | 2000.0               | 1728.0                 | 2144.0                 | 2136.0                | 2112.0                | 2136.0                | 2144.0                |           |
| Crystal size (mm)                                  | 0.078 × 0.043 × 0.026                              | 0.154 × 0.081 × 0.05 | 0.205 × 0.068 × 0.028  | 0.186 × 0.067 × 0.04   | 0.186 × 0.083 × 0.042 | 0.186 × 0.083 × 0.042 | 0.186 × 0.083 × 0.042 | 0.186 × 0.083 × 0.042 |           |
| 2 $\theta$ -range for data collection              | 8.48 to 152.698                                    | 8.532 to 153.614     | 9.94 to 152.868        | 8.542 to 152.866       | 5.67 to 46.502        | 5.696 to 46.5         | 6.738 to 52.742       | 6.746 to 52.742       |           |
| Min/max indices: <i>h, k, l</i>                    | -16/14,-25/26,-17/17                               | -12/17,-26/25,-18/18 | -16/15, -23/26, -17/17 | -17/16, -24/26, -18/14 | -15/7, -23/21, -9/15  | -15/7, -23/20, -9/15  | -17/7, -25/23, -9/17  | -17/7, -25/23, -9/17  |           |
| Reflect. Collected/unique                          | 8944/2010                                          | 18009/2270           | 7949/2178              | 8571/2261              | 4129/1531             | 4001/1515             | 5058/2136             | 5277/2149             |           |
| R <sub>int</sub>                                   | 0.2472                                             | 0.0458               | 0.0388                 | 0.0237                 | 0.1318                | 0.1315                | 0.1730                | 0.1796                |           |
| Refinement method                                  | Full-matrix least-squares on <i>F</i> <sup>2</sup> |                      |                        |                        |                       |                       |                       |                       |           |
| Completeness (%)                                   | 92                                                 | 100                  | 100                    | 100                    | 100                   | 100                   | 99                    | 99                    |           |
| Data/restraints/parameters                         | 2010/200/139                                       | 2270/0/155           | 2178/0/139             | 2261/0/182             | 1531/195/160          | 1515/166/160          | 2136/165/160          | 2149/221/182          |           |
| Goodness-of-fit on <i>F</i> <sup>2</sup>           | 1.008                                              | 1.096                | 1.084                  | 1.073                  | 0.998                 | 1.048                 | 0.980                 | 0.987                 |           |
| Final R1/wR <sup>2</sup> ( <i>I</i> >2 $\sigma$ 1) | 0.1234/0.2648                                      | 0.0569/0.1763        | 0.0746/0.2099          | 0.0446/0.1275          | 0.0719/0.1192         | 0.0741/0.1293         | 0.0913/0.1202         | 0.0897/0.1296         |           |
| R1/wR <sup>2</sup> (all data)                      | 0.2427/0.3443                                      | 0.0601/0.1817        | 0.0846/0.2218          | 0.0464/0.1300          | 0.1512/0.1560         | 0.1505/0.1687         | 0.2178/0.1721         | 0.2117/0.1843         |           |
| Largest diff. peak/hole (e.Å <sup>-3</sup> )       | 1.63/-1.12                                         | 1.48/-1.04           | 2.38/-1.81             | 1.73/-1.30             | 1.00/-0.63            | 1.05/-0.64            | 1.54/-0.65            | 1.39/-0.98            |           |

$$w=1/(\sigma^2 F_o^2+w_1^2 * P^2+w_2 * P), \text{ where } P=(\text{Max}(F_o^2,0)+2 * F_c^2)$$

|                                                    |                   |                                             |                         |                         |                         |                         |                         |                         |                       |
|----------------------------------------------------|-------------------|---------------------------------------------|-------------------------|-------------------------|-------------------------|-------------------------|-------------------------|-------------------------|-----------------------|
| Pressure/phase                                     | 0.3 GPa/ $\alpha$ | 0.55 GPa / $\beta$                          | 0.8 GPa / $\beta$       | 0.9 GPa / $\beta$       | 1.27 GPa / $\beta$      | 1.7 GPa / $\beta$       | 2.69 GPa / $\beta$      | 3.66 GPa / $\beta$      |                       |
| CCDC number                                        | 2046198           | 2046204                                     | 2046199                 | 2046200                 | 2046201                 | 2046205                 | 2046203                 | 2046202                 |                       |
| Formula weight                                     | 460.72            | 460.72                                      | 460.72                  | 460.72                  | 460.72                  | 460.72                  | 460.72                  | 460.72                  |                       |
| Wavelength (Å)                                     | 0.71073           | 0.71073                                     | 0.71073                 | 0.71073                 | 0.71073                 | 0.71073                 | 0.71073                 | 0.71073                 |                       |
| Crystal system                                     | orthorhombic      | Monoclinic                                  | monoclinic              | monoclinic              | monoclinic              | monoclinic              | monoclinic              | monoclinic              |                       |
| Space group                                        | <i>Cmce</i>       | <i>P2<sub>1</sub>/n</i>                     | <i>P2<sub>1</sub>/n</i> | <i>P2<sub>1</sub>/n</i> | <i>P2<sub>1</sub>/n</i> | <i>P2<sub>1</sub>/n</i> | <i>P2<sub>1</sub>/n</i> | <i>P2<sub>1</sub>/n</i> |                       |
| Unit cell dimensions                               | <i>a</i> (Å)      | 13.643(3)                                   | 12.230(3)               | 12.162(3)               | 12.132(3)               | 11.996(4)               | 11.854(3)               | 11.600(4)               | 11.362(6)             |
|                                                    | <i>b</i> (Å)      | 20.739(3)                                   | 14.03(2)                | 13.928(18)              | 13.893(18)              | 13.77(3)                | 13.68(2)                | 13.487(18)              | 13.31(3)              |
|                                                    | <i>c</i> (Å)      | 14.20(2)                                    | 12.539(2)               | 12.574(3)               | 12.591(2)               | 12.629(4)               | 12.773(3)               | 13.080(5)               | 13.269(8)             |
|                                                    | $\beta$ (°)       | 90                                          | 113.56(2)               | 113.67(3)               | 113.69(2)               | 113.84(4)               | 114.04(3)               | 114.57(4)               | 115.07(7)             |
| Volume (Å <sup>3</sup> )                           |                   | 4019(6)                                     | 1973(3)                 | 1951(3)                 | 1943(3)                 | 1908(5)                 | 1891(3)                 | 1861(3)                 | 1818(5)               |
| Z/Z'                                               |                   | 8/0.5                                       | 4/1                     | 4/1                     | 4/1                     | 4/1                     | 4/1                     | 4/1                     | 4/1                   |
| Molecular volume (V/Z)                             |                   | 502.37                                      | 493.25                  | 487.75                  | 485.75                  | 477.00                  | 472.75                  | 465.25                  | 454.50                |
| Calculated density (g/cm <sup>3</sup> )            |                   | 1.523                                       | 1.551                   | 1.569                   | 1.575                   | 1.603                   | 1.618                   | 1.644                   | 1.683                 |
| Absorption (mm <sup>-1</sup> )                     |                   | 1.115                                       | 1.136                   | 1.149                   | 1.153                   | 1.174                   | 1.185                   | 1.204                   | 1.233                 |
| <i>F</i> (000)                                     |                   | 1824.0                                      | 912.0                   | 912.0                   | 912.0                   | 912.0                   | 912.0                   | 912.0                   | 2144.0                |
| Crystal size (mm)                                  |                   | 0.285 × 0.106 × 0.076                       | 0.285 × 0.106 × 0.076   | 0.284 × 0.106 × 0.076   | 0.284 × 0.105 × 0.076   | 0.282 × 0.104 × 0.076   | 0.281 × 0.104 × 0.076   | 0.278 × 0.103 × 0.076   | 0.275 × 0.100 × 0.076 |
| 2 $\theta$ -range for data collection (°)          |                   | 7.15 to 43.924                              | 6.672 to 43.868         | 11.02 to 43.93          | 6.028 to 43.93          | 6.068 to 43.914         | 6.088 to 43.898         | 8.472 to 34.446         | 8.492 to 27.4         |
| Min/max indices: <i>h, k, l</i>                    |                   | -14/14, -21/21, -5/5                        | -12/12, -5/5, -13/13    | -12/12, -5/5, -13/13    | -12/12, -6/6, -13/13    | -12/12, -5/5, -13/13    | -12/12, -5/5, -13/13    | -9/9, -7/7, -10/10      | -7/7, -5/5, -8/8      |
| Reflect. Collected/unique                          |                   | 9246/586                                    | 8399/1065               | 7377/1054               | 8888/1077               | 4710/1006               | 8417/1034               | 5230/652                | 2771/314              |
| R <sub>int</sub>                                   |                   | 0.1485                                      | 0.1594                  | 0.2204                  | 0.1738                  | 0.1749                  | 0.1680                  | 0.2298                  | 0.1420                |
| Refinement method;                                 |                   | Full-matrix least-squares on F <sup>2</sup> |                         |                         |                         |                         |                         |                         |                       |
| Completeness (%)                                   |                   | 46                                          | 44                      | 44                      | 45                      | 43                      | 45                      | 58                      | 56                    |
| Data/restraints/parameters                         |                   | 586/221/139                                 | 1065/370/208            | 1054/248/166            | 1077/310/208            | 1006/373/208            | 1034/377/136            | 652/391/208             | 314/385/52            |
| Goodness-of-fit on F <sup>2</sup>                  |                   | 1.040                                       | 1.318                   | 1.112                   | 1.089                   | 1.135                   | 1.271                   | 1.330                   | 1.118                 |
| Final R1/wR <sup>2</sup> ( <i>I</i> >2 $\sigma$ 1) |                   | 0.0598/0.0,1634                             | 0.1385/0.3414           | 0.1204/0.2983           | 0.1111/0.2794           | 0.1215/0.3063           | 0.1182/0.3253           | 0.1298/0.3112           | 0.1784/0.4696         |
| R1/wR <sup>2</sup> (all data)                      |                   | 0.0971/0.1907                               | 0.1924/0.3887           | 0.1962/0.3597           | 0.1674/0.3280           | 0.2013/0.3686           | 0.1716/0.3782           | 0.1842/0.3737           | 0.2192/0.5564         |
| Largest diff. peak/hole (e.Å <sup>-3</sup> )       |                   | 0.37/-0.47                                  | 1.61/-1.57              | 0.95/-1.12              | 1.03/-1.15              | 1.00/-1.11              | 0.78/-1.09              | 0.74/-0.64              | 0.65/-0.80            |

$$w=1/(\sigma^2 F_o^2+w_1^2 * P^2+w_2 * P), \text{ where } P=(\text{Max}(F_o^2,0)+2 * F_c^2)$$

**Table S8.** Crystallographic data of compressed AMU3-DMF with MEW as PTM.

| Pressure/phase                               | 0.2 GPa / $\alpha$              | 0.4 GPa / $\alpha$     | 0.6 GPa / $\alpha$    | 0.8 GPa / $\beta$       | 1.0 GPa / $\beta$       | 1.12 GPa / $\beta$      | 1.4 GPa / $\beta$       |
|----------------------------------------------|---------------------------------|------------------------|-----------------------|-------------------------|-------------------------|-------------------------|-------------------------|
| CCDC number                                  | 2046210                         | 2046207                | 2046211               | 2046209                 | 2046208                 | 2046205                 | 2046409                 |
| Formula weight                               | 533.81                          | 533.81                 | 460.72                | 460.72                  | 460.72                  | 460.72                  | 460.72                  |
| Wavelength (Å)                               | 0.71073                         | 0.71073                | 0.71073               | 0.71073                 | 0.71073                 | 0.71073                 | 0.71073                 |
| Crystal system                               | orthorhombic                    | Orthorhombic           | orthorhombic          | monoclinic              | monoclinic              | monoclinic              | monoclinic              |
| Space group                                  | <i>Cmce</i>                     | <i>Cmce</i>            | <i>Cmce</i>           | <i>P2<sub>1</sub>/n</i> | <i>P2<sub>1</sub>/n</i> | <i>P2<sub>1</sub>/n</i> | <i>P2<sub>1</sub>/n</i> |
| Unit cell dimensions                         |                                 |                        |                       |                         |                         |                         |                         |
| <i>a</i> (Å)                                 | 13.707(2)                       | 13.729(2)              | 13.688(3)             | 12.56(3)                | 12.275(11)              | 12.241(12)              | 12.177(7)               |
| <i>b</i> (Å)                                 | 20.816(4)                       | 20.856(4)              | 20.77(5)              | 13.962(5)               | 13.969(8)               | 13.970(11)              | 13.957(9)               |
| <i>c</i> (Å)                                 | 14.544(3)                       | 14.403(2)              | 14.369(3)             | 12.60(3)                | 12.634(9)               | 12.627(11)              | 12.601(7)               |
| $\beta$ (°)                                  | 90                              | 90                     | 90                    | 115.1(3)                | 113.67(8)               | 113.67(9)               | 113.52(6)               |
| Volume (Å <sup>3</sup> )                     | 4150.1(12)                      | 4124.0(12)             | 4085(9)               | 2001(8)                 | 1984(3)                 | 1978(3)                 | 1964(3)                 |
| Z/Z'                                         | 8/0.5                           | 8/0.5                  | 8/0.5                 | 4/1                     | 4/1                     | 4/1                     | 4/1                     |
| Molecular volume (V/Z)                       | 518.76                          | 515.5                  | 510.62                | 500.25                  | 496.00                  | 494.50                  | 491.00                  |
| Calculated density (g/cm <sup>3</sup> )      | 1.709                           | 1.720                  | 1.498                 | 1.529                   | 1.542                   | 1.547                   | N/A                     |
| Absorption (mm <sup>-1</sup> )               | 1.098                           | 1.105                  | 1.097                 | 1.120                   | 1.130                   | 1.133                   | N/A                     |
| <i>F</i> (000)                               | 2144.0                          | 2144.0                 | 1824.0                | 912.0                   | 912.0                   | 912.0                   | N/A                     |
| Crystal size (mm)                            | 0.303 × 0.128 × 0.063           | 0.303 × 0.128 × 0.063  | 0.302 × 0.128 × 0.063 | 0.301 × 0.127 × 0.063   | 0.301 × 0.127 × 0.063   | 0.300 × 0.127 × 0.063   | 0.300 × 0.127 × 0.063   |
| 2 $\theta$ -range for data collection (°)    | 11.328 to 50.914                | 11.34 to 49.426        | 9.228 to 49.422       | 8.4 to 49.424           | 8.358 to 54.686         | 11.388 to 50.976        | N/A                     |
| Min/max indices: h, k, l                     | -15/15, -21/21, -13/13          | -15/15, -21/21, -14/14 | -16/16, -8/8, -16/16  | -9/9, -16/16, -10/9     | -10/11, -14/14, -       | -10/11, -13/13, -14/10  | N/A                     |
| Reflect. Collected/unique                    | 7456/1168                       | 7579/1387              | 7027/763              | 3273/998                | 6911/1597               | 4071/1328               | N/A                     |
| Rint                                         | 0.2133                          | 0.1686                 | 0.1988                | 0.1845                  | 0.2393                  | 0.2060                  | N/A                     |
| Refinement method;                           | Full-matrix least-squares on F2 |                        |                       |                         |                         |                         |                         |
| Completeness (%)                             | 59                              | 75                     | 42                    | 29                      | 42                      | 37                      | N/A                     |
| Data/restraints/parameters                   | 1168/302/182                    | 1387/274/168           | 763/375/131           | 998/667/124             | 1597/406/208            | 1328/291/208            | N/A                     |
| Goodness-of-fit on F2                        | 1.380                           | 2.007                  | 1.266                 | 1.275                   | 1.064                   | 1.041                   | N/A                     |
| Final R1/wR2 ( <i>I</i> >2 $\sigma$ 1)       | 0.1448/0.3534                   | 0.2497/0.5497          | 0.1183/0.3180         | 0.1519/0.3813           | 0.1424/0.3587           | 0.1435/0.3394           | N/A                     |
| R1/wR2 (all data)                            | 0.2456/0.4519                   | 0.3614/0.6414          | 0.2354/0.4450         | 0.2790/0.5058           | 0.2808/0.4493           | 0.2950/0.4466           | N/A                     |
| Largest diff. peak/hole (e.Å <sup>-3</sup> ) | 1.22/-1.11                      | 1.78/-2.25             | 0.91/-1.03            | 0.52/-0.53              | 0.74/-0.98              | 0.73/-0.89              | N/A                     |

**Table S9.** Crystallographic data of compressed AMU3-DMF with glycerine as PTM

$$w=1/(\sigma^2F_o^2+w_1^2*P^2+w_2*P), \text{ where } P=(\text{Max}(F_o^2,0)+2*F_c^2)$$

| Pressure                                                                       |              | 0.4 GPa / $\alpha$                                 | 0.5 GPa / $\alpha$    | 0.6 GPa / $\alpha$    | 0.88 GPa / $\beta$      | 1.0 GPa / $\beta$       |
|--------------------------------------------------------------------------------|--------------|----------------------------------------------------|-----------------------|-----------------------|-------------------------|-------------------------|
| CCDC number                                                                    |              | 2046219                                            | 2046217               | 2046216               | 2046220                 | 2046218                 |
| Formula weight                                                                 |              | 501.77                                             | 501.77                | 460.72                | 460.72                  | 460.72                  |
| Wavelength (Å)                                                                 |              | 0.71073                                            | 0.71073               | 0.71073               | 0.71073                 | 0.71073                 |
| Crystal system                                                                 |              | orthorhombic                                       | Orthorhombic          | orthorhombic          | monoclinic              | monoclinic              |
| Space group                                                                    |              | <i>Cmce</i>                                        | <i>Cmce</i>           | <i>Cmce</i>           | <i>P2<sub>1</sub>/n</i> | <i>P2<sub>1</sub>/n</i> |
| Unit cell dimensions                                                           | <i>a</i> (Å) | 13.659(4)                                          | 13.6209(16)           | 13.6195(11)           | 12.372(3)               | 12.368(2)               |
|                                                                                | <i>b</i> (Å) | 20.669(7)                                          | 20.750(2)             | 20.7923(17)           | 14.15(3)                | 14.14(2)                |
|                                                                                | <i>c</i> (Å) | 14.39(6)                                           | 14.33(2)              | 14.241(15)            | 12.433(4)               | 12.444(2)               |
|                                                                                | $\beta$ (°)  | 90                                                 | 90                    | 90                    | 113.58(3)               | 113.65(2)               |
| Volume (Å <sup>3</sup> )                                                       |              | 4063(17)                                           | 4049(6)               | 4033(4)               | 1995(4)                 | 1994(4)                 |
| Z/Z'                                                                           |              | 8/0.5                                              | 8/0.5                 | 8/0.5                 | 4/1                     | 4/1                     |
| Molecular volume (V/Z)                                                         |              | 507.87                                             | 506.12                | 504.12                | 498.75                  | 498.50                  |
| Calculated density (g/cm <sup>3</sup> )                                        |              | 1.611                                              | 1.646                 | 1.518                 | 1.534                   | 1.535                   |
| Absorption (mm <sup>-1</sup> )                                                 |              | 1.111                                              | 1.116                 | 1.111                 | 1.123                   | 1.124                   |
| <i>F</i> (000)                                                                 |              | 1928.0                                             | 2000.0                | 1824.0                | 912.0                   | 912.0                   |
| Crystal size (mm)                                                              |              | 0.387 × 0.068 × 0.051                              | 0.387 × 0.068 × 0.051 | 0.387 × 0.068 × 0.051 | 0.387 × 0.068 × 0.051   | 0.386 × 0.068 × 0.051   |
| 2 $\theta$ -range for data collection (°)                                      |              | 7.204 to 46.698                                    | 7.158 to 42.454       | 9.628 to 46.502       | 8.368 to 37.686         | 9.648 to 41.624         |
| Min/max indices: <i>h, k, l</i>                                                |              | -15/15, -20/22, -4/5                               | -13/13, -21/21, -4/4  | -15/15, -23/23, -5/5  | -11/11, -5/5, -11/11    | -12/12, -5/5, -12/12    |
| Reflect. Collected/unique                                                      |              | 7441/566                                           | 7254/457              | 9945/630              | 5526/689                | 8181/858                |
| <i>R</i> <sub>int</sub>                                                        |              | 0.2847                                             | 0.2013                | 0.0964                | 0.1862                  | 0.0991                  |
| Refinement method;                                                             |              | Full-matrix least-squares on <i>F</i> <sup>2</sup> |                       |                       |                         |                         |
| Completeness (%)                                                               |              | 36                                                 | 38                    | 42                    | 44                      | 41                      |
| Data/restraints/parameters                                                     |              | 566/288/119                                        | 457/303/139           | 630/350/139           | 689/551/208             | 858/347/196             |
| Goodness-of-fit on <i>F</i> <sup>2</sup>                                       |              | 1.071                                              | 1.108                 | 1.537                 | 1.299                   | 1.654                   |
| Final <i>R</i> <sub>1</sub> / <i>wR</i> <sup>2</sup> ( <i>I</i> >2 $\sigma$ 1) |              | 0.1000/0.2365                                      | 0.0718/0.2102         | 0.1170/0.3271         | 0.1125/0.2923           | 0.1267/0.3430           |
| <i>R</i> <sub>1</sub> / <i>wR</i> <sup>2</sup> (all data)                      |              | 0.2139/0.3175                                      | 0.1222/0.2531         | 0.1573/0.3717         | 0.1775/0.3577           | 0.1803/0.4056           |

**Table S10.** Crystallographic data of compressed AMU3-MeCN with MEW as PTM.

Largest diff. peak/hole ( $e.\text{\AA}^{-3}$ )    0.82/-0.43    0.59/-0.39    1.36/-2.24    0.88/-0.60    1.09/-1.19

$$w=1/(\sigma^2 F_o^2 + w_1^2 * P^2 + w_2 * P), \text{ where } P=(\text{Max}(F_o^2, 0) + 2 * F_c^2)$$
